# Supplementary material
Source: MDPI journal article supplement (https://www.mdpi.com/1999-4907/12/3/338)
Supplement: s1 [file s1]

## Supplementary material for the Article:

Michelet, C.; Zeppilli, D.; Hubas, C.; Baldrighi, E.; Cuny, P.; Dirberg, G.; Milton, C.; Walcker, R.; Lamy, D.; Jézéquel, R.; Receveur, J.; Gilbert, F.; Houssainy, A.E.; Dufour, A.; Heimbürger-Boavida, L.-E.; Bihannic, I.; Sylvi, L.; Vivier, B.; Michaud, E. First Assessment of the Benthic Meiofauna Sensitivity to Low Human-Impacted Mangroves in French Guiana. *Forests* **2021**, *12*, 338. <https://doi.org/10.3390/f12030338>

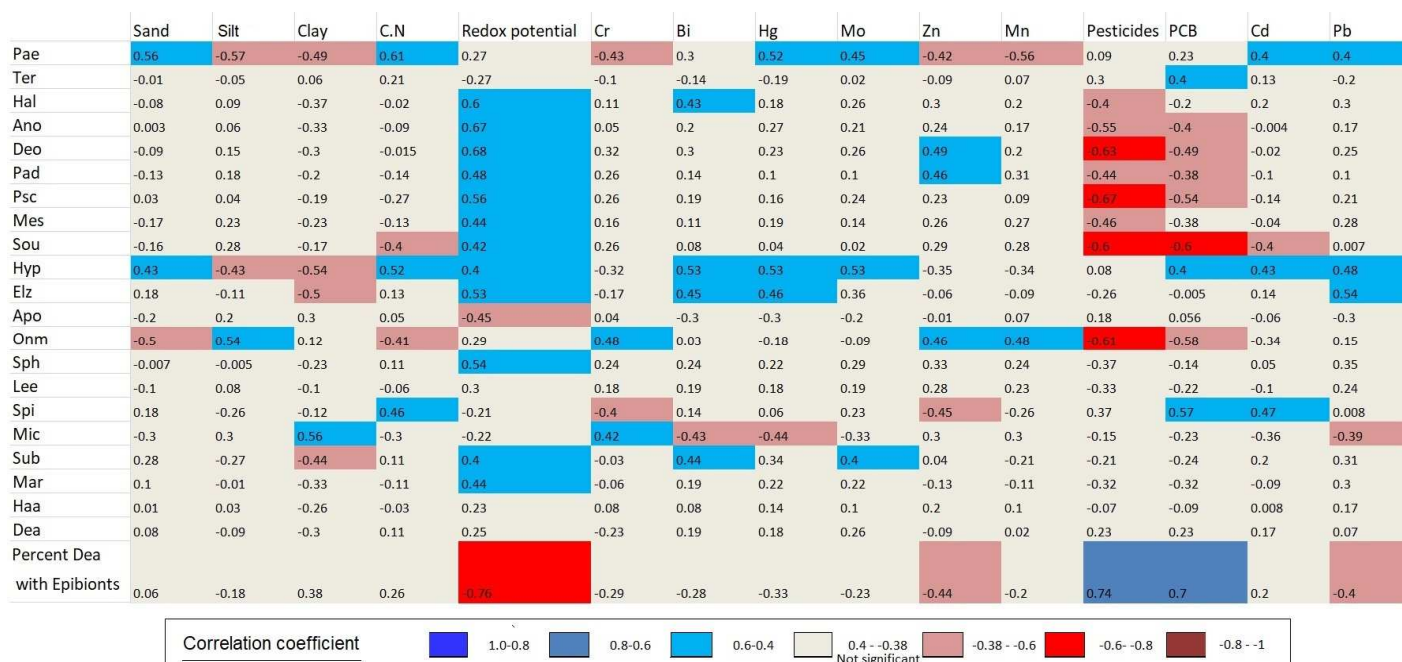

**Figure S5:** Table of correlation coefficients (Spearman) between significant sediment and nematodes variables discriminating the stations
