# Supplementary material
Source: MDPI journal article supplement (https://www.mdpi.com/1999-4907/12/3/338)
Supplement: s1 [file s1]

# Supplementary material for the Article:

Michelet, C.; Zeppilli, D.; Hubas, C.; Baldrighi, E.; Cuny, P.; Dirberg, G.; Militon, C.; Walcker, R.; Lamy, D.; Jézéquel, R.; Receveur, J.; Gilbert, F.; Houssainy, A.E.; Dufour, A.; Heimbürger-Boavida, L.-E.; Bihannic, I.; Sylvi, L.; Vivier, B.; Michaud, E. First Assessment of the Benthic Meiofauna Sensitivity to Low Human-Impacted Mangroves in French Guiana. *Forests* **2021**, *12*, 338. <https://doi.org/10.3390/f12030338>

| Family           | Genus                    | Genus abbreviation | Trophic group | Station 1                      |                      | Station 2                      |                      | Station 3                      |                      |
|------------------|--------------------------|--------------------|---------------|--------------------------------|----------------------|--------------------------------|----------------------|--------------------------------|----------------------|
|                  |                          |                    |               | Density ind.10cm <sup>-2</sup> | Relative density (%) | Density ind.10cm <sup>-2</sup> | Relative density (%) | Density ind.10cm <sup>-2</sup> | Relative density (%) |
| anoplostomatidae | <i>Anoplostoma</i>       | Ano                | 1B            | 113 ± 71                       | 5 ± 3                | 0                              | 0                    | 452 ± 128                      | 7 ± 0.5              |
| Aponchiidae      | <i>Synonema</i>          | NA                 | 2A            | 0                              | 0                    | 0                              | 0                    | 33.2 ± 44.3                    | 0.4 ± 0.5            |
| Axonolaimidae    | <i>Parodontophora</i>    | Pad                | 1B            | 28 ± 19                        | 12 ± 8               | 0                              | 0                    | 294 ± 43                       | 5 ± 1                |
|                  | <i>Pseudolella</i>       | NA                 | 2A            | 0                              | 0                    | 6.3 ± 8.4                      | 0.1 ± 0.13           | 0                              | 0                    |
| Camacolaimidae   | <i>Camacolaimus</i>      | NA                 | 2A            | 0                              | 0                    | 7.7 ± 10.3                     | 0.12 ± 0.16          | 25.4 ± 26.7                    | 0.3 ± 0.3            |
|                  | <i>Deontolaimus</i>      | Deo                | 2A            | 99 ± 55                        | 4 ± 2                | 0                              | 0                    | 508 ± 79                       | 9 ± 3                |
|                  | <i>Diodontolaimus</i>    | NA                 | 2A            | 3.4 ± 4.6                      | 0.14 ± 0.18          | 0                              | 0                    | 0                              | 0                    |
|                  | <i>Listia</i>            | NA                 | 2A            | 3.4 ± 4.6                      | 0.14 ± 0.18          | 0                              | 0                    | 8 ± 1                          | 0.17 ± 0.23          |
| Chromadoridae    | <i>Onchium</i>           | NA                 | 2A            | 0                              | 0                    | 0                              | 0                    | 144 ± 151                      | 1.8 ± 1.7            |
|                  | <i>Acantholaimus</i>     | NA                 | 2A            | 0                              | 0                    | 25 ± 33.4                      | 0.4 ± 0.5            | 0                              | 0                    |
|                  | <i>Hypodontolaimus</i>   | Hyp                | 2A            | 130 ± 63                       | 6 ± 3                | 0                              | 0                    | 0                              | 0                    |
|                  | <i>Karkinochromadora</i> | NA                 | 2A            | 3.8 ± 5                        | 0.16 ± 0.22          | 28.8 ± 38.4                    | 0.4 ± 0.6            | 63.3 ± 84.4                    | 1.4 ± 1.9            |
| Comesomatidae    | <i>Neochromadora</i>     | Neo                | 2A            | 56 ± 27                        | 2 ± 1                | 73 ± 69                        | 1 ± 1                | 8 ± 10                         | 0.2 ± 0.2            |
|                  | <i>Ceroonema</i>         | NA                 | 1B            | 0                              | 0                    | 0                              | 0                    | 5.65 ± 7.5                     | 0.1 ± 0.13           |
|                  | <i>Ptycholaimellus</i>   | Pty                | 2A            | 0                              | 0                    | 214 ± 121                      | 3 ± 2                | 100 ± 52                       | 2 ± 1                |
|                  | <i>Sabatieria</i>        | NA                 | 1B            | 0                              | 0                    | 0                              | 0                    | 24.1 ± 32.1                    | 0.3 ± 0.4            |
| Cyatholaimidae   | <i>Setosabatieria</i>    | NA                 | 1B            | 0                              | 0                    | 10.7 ± 14.3                    | 0.3 ± 0.4            | 0                              | 0                    |
|                  | <i>Cyatholaimus</i>      | NA                 | 2A            | 4.6 ± 6.1                      | 0.2 ± 0.3            | 0                              | 0                    | 0                              | 0                    |
|                  | <i>Longicyatholaimus</i> | NA                 | 2A            | 3.4 ± 4.6                      | 0.14 ± 0.18          | 0                              | 0                    | 0                              | 0                    |
|                  | <i>Marylynnia</i>        | NA                 | 2A            | 12.1 ± 16.1                    | 0.5 ± 0.7            | 0                              | 0                    | 17.4 ± 7.6                     | 0.3 ± 0.13           |
| Desmoscolecidae  | <i>Paracomesoma</i>      | NA                 | 2A            | 2.95 ± 3.94                    | 0.13 ± 0.17          | 19.6 ± 26.1                    | 0.3 ± 0.4            | 5.6 ± 7.5                      | 0.1 ± 0.13           |
|                  | <i>Paracyatholaimus</i>  | NA                 | 2A            | 25.4 ± 21.1                    | 1.09 ± 0.9           | 36.9 ± 24.6                    | 0.75 ± 0.5           | 0                              | 0                    |
|                  | <i>Calligyus</i>         | NA                 | 1A            | 0                              | 0                    | 0                              | 0                    | 9.4 ± 12.5                     | 0.16 ± 0.21          |
|                  | <i>Desmoscolex</i>       | NA                 | 1A            | 0                              | 0                    | 0                              | 0                    | 8.5 ± 11.3                     | 0.1 ± 0.13           |
| Desmodoridae     | <i>Desmodora</i>         | Dea                | 2A            | 648 ± 158                      | 27 ± 6               | 912 ± 517                      | 14.5 ± 7             | 293 ± 132                      | 6 ± 3                |
|                  | <i>Metachromadora</i>    | NA                 | 2B            | 0                              | 0                    | 10.7 ± 14.3                    | 0.3 ± 0.4            | 0                              | 0                    |
|                  | <i>Spirinia</i>          | Spi                | 2A            | 252 ± 154                      | 10 ± 6               | 343 ± 92                       | 7 ± 4                | 0                              | 0                    |
| Diplopeltidae    | <i>Araeolaimus</i>       | NA                 | 1A            | 0                              | 0                    | 0                              | 0                    | 28.6 ± 36.2                    | 0.49 ± 0.65          |
|                  | <i>Campylaimus</i>       | NA                 | 1B            | 0                              | 0                    | 19.6 ± 26.1                    | 0.3 ± 0.4            | 0                              | 0                    |
|                  | <i>Southerniella</i>     | Sou                | 1A            | 7 ± 9                          | 0.3 ± 0.4            | 0                              | 0                    | 163 ± 94                       | 2 ± 1                |
| Enchelidiidae    | <i>Polygastrophora</i>   | NA                 | 2B            | 0                              | 0                    | 21.3 ± 28.4                    | 0.33 ± 0.44          | 0                              | 0                    |
|                  | <i>Paraethmolaimus</i>   | Pae                | 2A            | 114 ± 118                      | 5 ± 5                | 0                              | 0                    | 0                              | 0                    |
|                  | <i>Halaphanolaimus</i>   | NA                 | 1A            | 4.7 ± 6.2                      | 0.19 ± 0.25          | 0                              | 0                    | 11.4 ± 15.3                    | 0.25 ± 0.34          |
| Ethmolaimidae    |                          |                    |               |                                |                      |                                |                      |                                |                      |
| Leptolaimidae    | <i>Leptolaimoides</i>    | NA                 | 1A            | 9.9 ± 6.6                      | 0.4 ± 0.3            | 0                              | 0                    | 54.6 ± 46.9                    | 0.7 ± 0.5            |
|                  | <i>Leptolaimus</i>       | NA                 | 1A            | 3.78 ± 5                       | 0.16 ± 0.2           | 19.6 ± 26.1                    | 0.3 ± 0.4            | 30.3 ± 20.2                    | 0.6 ± 0.4            |
|                  | <i>Pseudocella</i>       | Psc                | 2A            | 77 ± 21                        | 3 ± 1                | 39 ± 52                        | 1 ± 1                | 670 ± 275                      | 10 ± 3               |
| Linhomoeidae     | <i>Anticyathus</i>       | NA                 | 1B            | 0                              | 0                    | 0                              | 0                    | 18.8 ± 25.1                    | 0.3 ± 0.4            |
|                  | <i>Desmolaimus</i>       | NA                 | 1B            | 15 ± 20.1                      | 0.67 ± 0.88          | 21.6 ± 28.8                    | 0.56 ± 0.74          | 45.2 ± 49                      | 0.97 ± 1.1           |

|                  |                             |     |    |             |             |             |             |              |             |
|------------------|-----------------------------|-----|----|-------------|-------------|-------------|-------------|--------------|-------------|
|                  | <i>Disconema</i>            | NA  | 1A | 0           | 0           | 0           | 0           | 37.7 ± 50.2  | 0.64 ± 0.86 |
|                  | <i>Eleutherolaimus</i>      | NA  | 1B | 0           | 0           | 107.1 ±     | 1.6 ± 1.9   | 0.9 ± 1.2    | 0.16 ± 0.2  |
|                  | <i>Linhomoeus</i>           | NA  | 2A | 0           | 0           | 71.4        | 0           | 9.4 ± 12.5   | 0.16 ± 0.2  |
|                  | <i>Megadesmolaimus</i>      | NA  | 1B | 0           | 0           | 0           | 0.6 ± 0.4   | 4.2 ± 5.6    | 0.05 ± 0.07 |
|                  | <i>Metalinhomoeus</i>       | Mel | 1B | 0           |             | 30.3 ± 20.2 | 3 ± 2       | 0            | 0           |
|                  |                             |     |    |             |             | 193 ± 107   |             |              |             |
|                  | <i>Linhomoeus</i>           | Pal | 1B | 5 ± 6       | 0.2 ± 0.2   | 164 ± 109   | 2.5 ± 2     | 61 ± 58      | 1 ± 1       |
|                  | <i>Terschellingia</i>       | Ter | 1A | 96 ± 47     | 4 ± 2       | 1410 ± 525  | 28 ± 12     | 14.5 ± 19    | 3 ± 4       |
|                  | <i>Aponema</i>              | NA  | 2A | 0           | 0           | 28.6 ± 30.7 | 0.7 ± 0.8   | 0            | 0           |
| Microalaimidae   | <i>Microalaimus</i>         | Mic | 2A | 15 ± 8      | 1 ± 0.4     | 367 ± 248   | 8 ± 7       | 1178 ± 560   | 17 ± 6.5    |
|                  | <i>Molgolaimus</i>          | Mol | 1A | 5 ± 6       | 0.2 ± 0.3   | 140 ± 102   | 2 ± 2       | 39 ± 17      | 1 ± 0.1     |
|                  | <i>Diplolaimella</i>        | NA  | 1B | 0           | 0           | 85 ± 52     | 1.9 ± 5.5   | 3.5 ± 4.7    | 0.08 ± 0.1  |
| Monhysteridae    | <i>Halomonhystera</i>       | NA  | 1B | 0           | 0           | 0           | 0           | 4.2 ± 5.6    | 0.05 ± 0.07 |
|                  | <i>Thalassomonhystera</i>   | NA  | 1B | 0           | 0           | 19.6 ± 2.6  | 0.3 ± 0.4   | 0            | 0           |
| Oncholaimidae    | <i>Oncholaimus</i>          | NA  | 2B | 14.6 ± 9.7  | 0.6 ± 0.4   | 3.1 ± 4.2   | 0.05 ± 0.06 | 0            | 0           |
| Oxystominidae    | <i>Halalaimus</i>           | Hal | 1A | 185 ± 41    | 8 ± 2       | 144 ± 96    | 2 ± 1.5     | 583 ± 273    | 9 ± 2       |
|                  | <i>Nemanema</i>             | NA  | 1A | 3.4 ± 4.6   | 0.14 ± 0.18 | 0           | 0           | 0            | 0           |
|                  | <i>Oxystomina</i>           | NA  | 1A | 0           | 0           | 7.7 ± 10.3  | 0.12 ± 0.16 | 0            | 0           |
|                  | <i>Paroxystomina</i>        | NA  | 1A | 0           | 0           | 0           |             | 3.5 ± 4.7    | 0.08 ± 0.1  |
| Rhabditidae      | <i>Wieseria</i>             | NA  | 1A | 0           | 0           | 19.6 ± 26.1 | 0.3 ± 0.4   | 0            | 0           |
|                  | <i>Rhabditis</i>            | NA  | 1A | 0           | 0           | 0           | 0           | 13.6 ± 9.7   | 0.2 ± 0.2   |
|                  |                             |     |    |             |             | 105.5 ±     |             |              |             |
| Selachinematidae | <i>Halichoanolaimus</i>     | NA  | 2B | 24.7 ± 1.8  | 1 ± 0.08    | 37.4        | 1.8 ± 0.4   | 106.4 ± 27.8 | 1.9 ± 0.9   |
|                  | <i>Richtersia</i>           | Ric | 1B | 5 ± 6       | 0.2 ± 0.3   | 245 ± 198   | 4 ± 3       | 0            | 0           |
| Siphonolaimidae  | <i>Astomonema</i>           | NA  | 2B | 0           | 0           | 21.6 ± 28.8 | 0.56 ± 0.7  | 0            | 0           |
| Sphaerolaimidae  | <i>Metasphaerolaimus</i>    | Mes | 2B | 320 ± 220   | 1 ± 1       | 0           | 0           | 151 ± 70     | 2.5 ± 1     |
|                  | <i>Sphaerolaimus</i>        | Sph | 2B | 64 ± 40     | 3 ± 2       | 39 ± 52     | 1 ± 1       | 222 ± 84     | 3.5 ± 1     |
|                  | <i>Subsphaerolaimus</i>     | Sub | 2B | 48 ± 17     | 2 ± 1       | 0           | 0           | 7 ± 6        | 1 ± 1       |
|                  | <i>Amphimonhystrella</i>    | NA  | 1B | 0           | 0           | 7 ± 4.7     | 0.14 ± 0.09 | 3.5 ± 4.7    | 0.08 ± 0.01 |
|                  | <i>Daptonema</i>            | Dap | 1B | 0           | 0           | 183 ± 122   | 3 ± 2       | 84 ± 62      | 1 ± 1       |
|                  | <i>Cobbia</i>               | Cob | 2A | 36 ± 10     | 1.5 ± 0.5   | 65 ± 33     | 1 ± 1       | 19 ± 8       | 3 ± 1       |
|                  | <i>Elzalia</i>              | Elz | 1B | 109 ± 34    | 5 ± 2       | 43 ± 50     | 1 ± 1       | 263 ± 105    | 4 ± 1       |
|                  | <i>Gnomoxyala</i>           | NA  | 1B | 0           | 0           | 19.6 ± 26.1 | 0.3 ± 0.4   | 3.8 ± 5      | 0.06 ± 0.09 |
| Xyalidae         | <i>Linhystera</i>           | NA  | 1A | 0           | 0           | 44.6 ± 29.7 | 0.69 ± 0.46 | 24.5 ± 32.6  | 0.4 ± 0.07  |
|                  | <i>Paramonohystera</i>      | NA  | 1B | 24.4 ± 12.5 | 1.05 ± 0.55 | 3.8 ± 5     | 0.06 ± 0.08 | 5.6 ± 7.5    | 0.1 ± 0.13  |
|                  | <i>Paramphimonhystrella</i> | NA  | 1B | 0           | 0           | 0           | 0           | 5.6 ± 7.5    | 0.1 ± 0.13  |
|                  | <i>Stylotheristus</i>       | NA  | 1B | 0           | 0           | 3.2 ± 4.3   | 0.08 ± 0.1  | 0            | 0           |
|                  | <i>Theristus</i>            | NA  | 1B | 0           | 0           | 27.1 ± 36.1 | 0.4 ± 0.6   | 0            | 0           |
|                  | <i>Zygonemella</i>          | Zyg | 1B | 8 ± 4       | 3 ± 1.5     | 287 ± 191   | 4 ± 3       | 35 ± 23      | 1 ± 0.4     |

**Figure S3:** Comprehensive list of the Nematode families and genus found at the three stations of the Cayenne estuary. This table presents the trophic groups for each genus (1A: bacterivorous ; 1B: non-selective detritivores ; 2A: grazers; 2B: omnivorous-predators) and their mean density (individuals per 10cm<sup>2</sup>; ± SD) and mean relative densities (%; ± SD) at each station.
