# Supplementary material
Source: MDPI journal article supplement (https://www.mdpi.com/1999-4907/12/3/338)
Supplement: s1 [file s1]

# Supplementary material for the Article:

Michelet, C.; Zeppilli, D.; Hubas, C.; Baldrighi, E.; Cuny, P.; Dirberg, G.; Militon, C.; Walcker, R.; Lamy, D.; Jézéquel, R.; Receveur, J.; Gilbert, F.; Houssainy, A.E.; Dufour, A.; Heimbürger-Boavida, L.-E.; Bihannic, I.; Sylvi, L.; Vivier, B.; Michaud, E. First Assessment of the Benthic Meiofauna Sensitivity to Low Human-Impacted Mangroves in French Guiana. *Forests* **2021**, *12*, 338. <https://doi.org/10.3390/f12030338>

|                                                                         |      | Main effect    |           | Pairwise comp |    |    | Main effect  |          | Pairwise comp |    |    | Interaction effect |   | Pairwise comp |    |    |
|-------------------------------------------------------------------------|------|----------------|-----------|---------------|----|----|--------------|----------|---------------|----|----|--------------------|---|---------------|----|----|
|                                                                         | test | Station effect |           |               |    |    | Depth effect |          |               |    |    | Station*depth      |   |               |    |    |
|                                                                         |      | stats          | p         | S1            | S2 | S3 | stats        | p        | L1            | L2 | L3 | stats              | p | S1            | S2 | S3 |
| Physico-chemical parameters                                             |      |                |           |               |    |    |              |          |               |    |    |                    |   |               |    |    |
| Redox potential (mV)                                                    | SRH  | H=17.3         | p=0.0002  | b             | a  | b  |              |          |               |    |    |                    |   |               |    |    |
| Granulometry (%)                                                        |      |                |           |               |    |    |              |          |               |    |    |                    |   |               |    |    |
| Clay                                                                    | SRH  | H=21.1         | p=0.00003 | a             | c  | b  |              |          |               |    |    |                    |   |               |    |    |
| Silt                                                                    |      | H=18.2         | p=0.0001  | a             | b  | b  |              |          |               |    |    |                    |   |               |    |    |
| Sand                                                                    |      | H=17.5         | p=0.0002  | b             | a  | a  |              |          |               |    |    |                    |   |               |    |    |
| Carbon and Nitrogen                                                     |      |                |           |               |    |    |              |          |               |    |    |                    |   |               |    |    |
| C:N                                                                     | SRH  | H=19.1         | p=0.0001  | b             | a  | a  |              |          |               |    |    |                    |   |               |    |    |
| TOC                                                                     | SRH  | H=16.7         | p=0.0002  | b             | a  | a  |              |          |               |    |    |                    |   |               |    |    |
| Prokaryotic community (number of 16S gene copies mg <sup>-1</sup> d.w.) |      |                |           |               |    |    |              |          |               |    |    |                    |   |               |    |    |
| BAC 16S                                                                 | SRH  | H=15.3         | p=0.0005  | b             | a  | a  |              |          |               |    |    |                    |   |               |    |    |
| Pigments concentrations (µg cm <sup>-3</sup> )                          |      |                |           |               |    |    |              |          |               |    |    |                    |   |               |    |    |
| An                                                                      | SRH  | H=10.2         | p=0.006   | b             | b  | a  | H=7.5        | p=0.02   | b             | ab | a  |                    |   |               |    |    |
| Bb                                                                      | SRH  | H=14.2         | p=0.001   | a             | b  | a  |              |          |               |    |    |                    |   |               |    |    |
| Ca                                                                      |      |                |           |               |    |    | H=15         | p=0.0006 | b             | a  | a  |                    |   |               |    |    |
| Cb                                                                      |      |                |           |               |    |    | H=12.3       | p=0.002  | b             | b  | a  |                    |   |               |    |    |
| F                                                                       |      |                |           |               |    |    | H=10.5       | p=0.005  | b             | a  | a  |                    |   |               |    |    |
| L                                                                       | SRH  | H=7.05         | p=0.03    | ab            | b  | a  | H=10.3       | p=0.005  | b             | ab | a  |                    |   |               |    |    |
| Pda                                                                     |      |                |           |               |    |    | H=11.8       | p=0.003  | b             | a  | a  |                    |   |               |    |    |
| Pha                                                                     |      |                |           |               |    |    | H=12.4       | p=0.002  | b             | a  | a  |                    |   |               |    |    |

|                                                              |     |        |                    |   |    |    |        |         |   |   |   |  |  |  |  |  |  |
|--------------------------------------------------------------|-----|--------|--------------------|---|----|----|--------|---------|---|---|---|--|--|--|--|--|--|
| UP1                                                          |     |        |                    |   |    |    | H=12.7 | p=0.002 | b | a | a |  |  |  |  |  |  |
| UP2                                                          |     |        |                    |   |    |    | H=14.5 | p=0.001 | b | a | a |  |  |  |  |  |  |
| UP3                                                          |     |        |                    |   |    |    | H=11.7 | p=0.003 | b | a | a |  |  |  |  |  |  |
| UP4                                                          | SRH | H=7    | p=0.03             | a | b  | ab |        |         |   |   |   |  |  |  |  |  |  |
| Vio                                                          | SRH | H=9.2  | p=0.01             | a | b  | a  | H=6.3  | p=0.04  | b | a | a |  |  |  |  |  |  |
| Concentrations of organic contaminants (ng g <sup>-1</sup> ) |     |        |                    |   |    |    |        |         |   |   |   |  |  |  |  |  |  |
| PAHs                                                         | SRH | H=11.1 | p=0.004            | a | a  | b  |        |         |   |   |   |  |  |  |  |  |  |
| Pesticides                                                   | SRH | H=17.4 | p=0.0002           | b | b  | a  |        |         |   |   |   |  |  |  |  |  |  |
| PCB                                                          | SRH | H=17.9 | p=0.0001           | b | b  | a  |        |         |   |   |   |  |  |  |  |  |  |
| Concentrations of metals and metalloids (µg.g-1)             |     |        |                    |   |    |    |        |         |   |   |   |  |  |  |  |  |  |
| Al                                                           | A   | F=7.7  | p=0.004            | a | ab | b  |        |         |   |   |   |  |  |  |  |  |  |
| Ag                                                           | A   | F=7.6  | p=0.004            | b | a  | ab |        |         |   |   |   |  |  |  |  |  |  |
| As                                                           | SRH | H=10.6 | p=0.005            | b | a  | a  |        |         |   |   |   |  |  |  |  |  |  |
| Ba                                                           | A   | F=13.4 | P=0.0003           | a | a  | b  |        |         |   |   |   |  |  |  |  |  |  |
| Bi                                                           | A   | F=22.9 | p=10 <sup>-5</sup> | b | a  | a  |        |         |   |   |   |  |  |  |  |  |  |
| Cd                                                           | SRH | H=16   | p=0.0003           | b | a  | a  |        |         |   |   |   |  |  |  |  |  |  |
| Cr                                                           | A   | F=13.6 | P=0.0002           | a | b  | b  |        |         |   |   |   |  |  |  |  |  |  |
| Cs                                                           | A   | F=8.8  | p=0.002            | a | ab | b  |        |         |   |   |   |  |  |  |  |  |  |
| Hg                                                           | SRH | H=18.9 | P=0.0001           | c | a  | b  |        |         |   |   |   |  |  |  |  |  |  |
| Mn                                                           | SRH | H=17.2 | p=0.0002           | a | b  | b  |        |         |   |   |   |  |  |  |  |  |  |
| Mo                                                           | SRH | H=15.4 | p=0.0004           | b | a  | a  |        |         |   |   |   |  |  |  |  |  |  |
| Ni                                                           | SRH | H=8.8  | P=0.01             | a | ab | b  |        |         |   |   |   |  |  |  |  |  |  |
| Pb                                                           | SRH | H=13.7 | p=0.001            | c | a  | b  |        |         |   |   |   |  |  |  |  |  |  |
| U                                                            | SRH | H=7.6  | p=0.02             | b | a  | b  |        |         |   |   |   |  |  |  |  |  |  |
| V                                                            | SRH | H=10.9 | p=0.004            | a | b  | b  |        |         |   |   |   |  |  |  |  |  |  |
| Zn                                                           | SRH | H=12.8 | p=0.002            | a | a  | b  |        |         |   |   |   |  |  |  |  |  |  |

**Figure S2:** Differences in the most discriminant physical, chemical and biological sediment variables with a  $\cos^2 > 0.4$ , at the three stations of Cayenne estuary (S1, S2, S3) for each sediment depth (L1, L2, L3) after parametric two-way ANOVAs (F and p-values) or non parametric Scheirer-Ray-Hare (H and p-values) tests depending on the homogeneity of variances. Significant differences ( $p < 0.05$ ) are indicated by a different letter (a, b, c). Last column indicates the pairwise comparisons between the three stations.
