# Supplementary material
Source: MDPI journal article supplement (https://www.mdpi.com/1999-4907/12/3/338)
Supplement: s1 [file s1]

# Supplementary material for the Article:

Michelet, C.; Zeppilli, D.; Hubas, C.; Baldrighi, E.; Cuny, P.; Dirberg, G.; Militon, C.; Walcker, R.; Lamy, D.; Jézéquel, R.; Receveur, J.; Gilbert, F.; Houssainy, A.E.; Dufour, A.; Heimbürger-Boavida, L.-E.; Bihannic, I.; Sylvi, L.; Vivier, B.; Michaud, E. First Assessment of the Benthic Meiofauna Sensitivity to Low Human-Impacted Mangroves in French Guiana. *Forests* **2021**, *12*, 338. <https://doi.org/10.3390/f12030338>

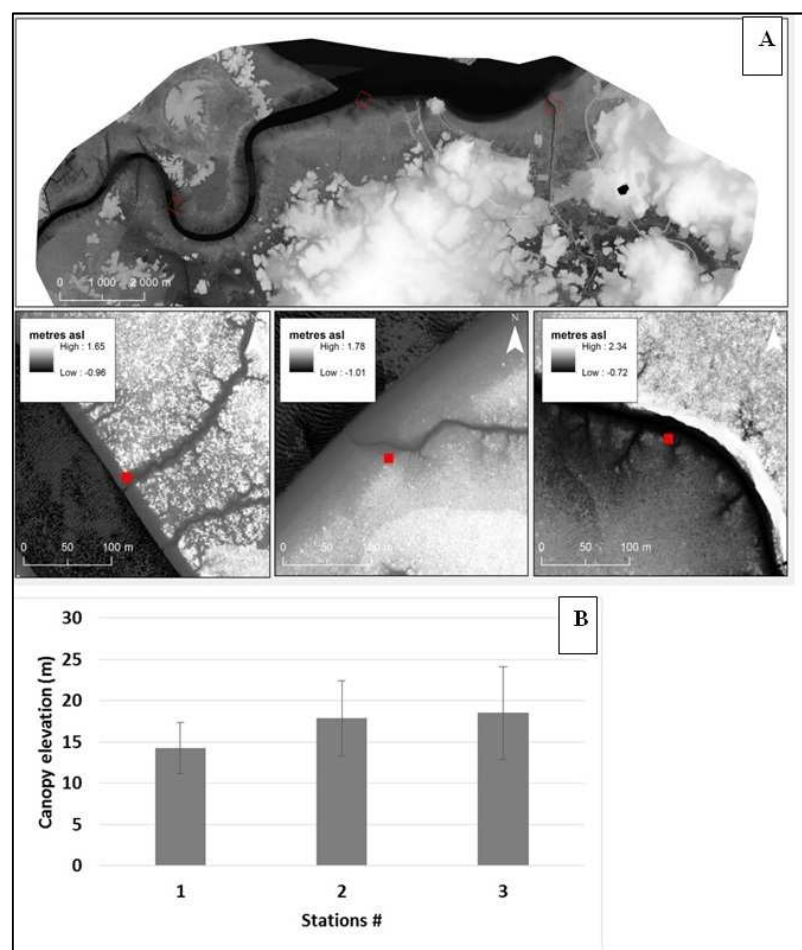

**Figure S1:** (A) Digital elevation model of the studied area. Data were obtained using a Digital Elevation Model (DEM) distributed by “Guyane SIG – Plateforme Territoriale” which can be retrieved at <https://catalogue.guyane-sig.fr/mapfishapp/map/9262ecd32a82ebc7308129df30603b2d>. The DEM was derived from a LIDAR survey made in 2015 with a ground pixel size of 1 m<sup>2</sup>. (B) For each of the three study sites, 100 elevation data points were extracted inside square plots and basic statistics were conducted (Min, Max, Mean and STD to the mean canopy elevation)
